# Supplementary material for: Central Hemodynamics in Relation to Circulating Desphospho‐Uncarboxylated Matrix Gla Protein: A Population Study
Source: PubMed Central journal article supplement — J Am Heart Assoc. 2019 Mar 22;8(7):e011960. doi: 10.1161/JAHA.119.011960 (PMC6509723; doi:10.1161/jaha.119.011960), 2019-03-22
Supplement: JAH3-8-e011960-s001.pdf [file JAH3-8-e011960-s001.pdf]

# **SUPPLEMENTAL MATERIAL**

**Table S1. Central Hemodynamic Characteristics by Tertiles of the dp-ucMGP Distribution.**

| Characteristics                 | Category of dp-ucMGP |                  |                  | P Value |
|---------------------------------|----------------------|------------------|------------------|---------|
| Limits ( $\mu\text{g/L}$ )      | <3.35                | 3.35–5.31        | $\geq 5.31$      |         |
| Augmentation ratio (%)          | 107.5 $\pm$ 6.7      | 109.3 $\pm$ 7.2† | 111.8 $\pm$ 7.2† | <0.001  |
| Augmentation index (%)          | 21.4 $\pm$ 11.8      | 23.9 $\pm$ 12.0* | 26.7 $\pm$ 10.9† | <0.001  |
| Pulse wave velocity (m/s)       | 6.84 $\pm$ 1.26      | 7.21 $\pm$ 1.63* | 8.09 $\pm$ 1.78† | <0.001  |
| Forward wave amplitude (mm Hg)  | 32.3 $\pm$ 9.4       | 32.7 $\pm$ 10.3  | 34.7 $\pm$ 10.8* | 0.013   |
| Backward wave amplitude (mm Hg) | 19.8 $\pm$ 6.4       | 21.2 $\pm$ 7.9*  | 24.6 $\pm$ 10.4† | <0.001  |

Values are means (SD). dp-ucMGP, desphospho-uncarboxylated matrix Gla protein. To convert dp-ucMGP from  $\mu\text{g/L}$  into  $\text{pmol/L}$ , multiply by 94.299. Pulse wave velocity was available in 657 participants. The augmentation ratio and index, pulse wave velocity, and forward and backward wave amplitudes were not standardized to a heart rate of 65 beats per minute (population mean). *P*-values denote the significance of the difference in means (ANOVA) across tertiles of the dp-ucMGP distribution. Significance of the difference with the adjacent lower tertile: \*  $P \leq 0.05$ ; †  $P \leq 0.01$ .

**Table S2. Hemodynamic Traits in the Top Quintile versus the Other Quintiles of the dp-ucMGP Distribution.**

| Hemodynamics                    | Unadjusted Models   |          | Adjusted Models       |          | Fully Adjusted Models |          |
|---------------------------------|---------------------|----------|-----------------------|----------|-----------------------|----------|
|                                 | Estimate (95%CI)    | <i>P</i> | Estimate (95%CI)      | <i>P</i> | Estimate (95%CI)      | <i>P</i> |
| Central pulse pressure (mm Hg)  | 9.19 (6.68 to 11.7) | <0.001   | 3.27 (0.86 to 5.68)   | 0.008    | 3.33 (0.96 to 5.70)   | 0.006    |
| Forward wave amplitude (mm Hg)  | 3.16 (1.43 to 4.88) | 0.0004   | 1.81 (0.01 to 3.60)   | 0.048    | 1.84 (0.06 to 3.61)   | 0.043    |
| Backward wave amplitude (mm Hg) | 5.48 (4.07 to 6.90) | <0.001   | 1.25 (0.09 to 2.42)   | 0.035    | 1.28 (0.12 to 2.43)   | 0.030    |
| Reflection magnitude (%)        | 7.97 (4.92 to 11.0) | <0.001   | -1.92 (-4.48 to 0.63) | 0.14     | -1.93 (-4.48 to 0.63) | 0.14     |

Association sizes (95% confidence interval) express the difference in the hemodynamic indexes between highest quintile and the remaining quintiles. Adjusted models accounted for sex, age, body mass index, mean arterial pressure (not for central pulse pressure), heart rate, waist-to-hip circumference ratio, serum total cholesterol and high-density lipoprotein cholesterol, plasma glucose, smoking and drinking, and use of antihypertensive drugs by class. Fully adjusted models additionally accounted for the ankle-to-arm systolic blood pressure ratio as index of subclinical atherosclerosis.

**Table S3. Correlates of Central Blood Pressure and the Augmentation Ratio and Augmentation Index.**

| Variables                                 | Central Blood Pressure (n=835) |             |             | Systolic Augmentation (n=835) |             |
|-------------------------------------------|--------------------------------|-------------|-------------|-------------------------------|-------------|
|                                           | SBP (mm Hg)                    | DBP (mm Hg) | PP (mm Hg)  | Ratio (%)                     | Index (%)   |
| R2                                        | 0.35                           | 0.20        | 0.31        | 0.67                          | 0.57        |
| Association size                          |                                |             |             |                               |             |
| Female sex (0,1)                          | -4.33±1.0†                     | -3.78±0.78† | ...         | 5.32±0.31†                    | 8.81±0.59†  |
| Age (+15.2 years)                         | 8.66±0.56†                     | 1.65±0.36†  | 6.80±0.54†  | 4.65±0.17†                    | 6.87±0.31†  |
| Mean arterial pressure (+10.8 mm Hg)      | ...                            | ...         | ...         | 1.28±0.17†                    | 2.16±0.32†  |
| Waist-to-hip circumference ratio (+0.08)  | ...                            | 0.87±0.45*  | -0.93±0.54  | ...                           | ...         |
| Body mass index (+4.1 kg/m <sup>2</sup> ) | ...                            | 0.92±0.36*  | ...         | -0.60±0.16†                   | -0.73±0.29* |
| Heart rate (+9.2 beats per minute)        | ...                            | 1.44±0.31†  | -1.85±0.45† | -1.79±0.15†                   | -2.72±0.29† |
| Serum total cholesterol (+0.92 mmol/L)    | 0.87±0.50                      | 1.62±0.30†  | -1.03±0.48* | ...                           | 0.52±0.28   |
| HDL cholesterol (+0.35 mmol/L)            | ...                            | ...         | 0.82±0.52   | ...                           | ...         |
| Plasma glucose (+0.76 mmol/L)             | ...                            | ...         | 0.99±0.47*  | ...                           | -0.44±0.28  |
| Smoking (0,1)                             | -3.03±1.36*                    | ...         | ...         | 1.56±0.40†                    | 3.85±0.75†  |
| Drinking (0,1)                            | ...                            | 1.04±0.64   | ...         | ...                           | ...         |
| Use of antihypertensive drugs (0,1)       | 5.55±1.35†                     | -1.20±0.82  | 6.32±1.22†  | 0.81±0.40*                    | ...         |

SBP, systolic blood pressure; DBP, diastolic blood pressure; PP, pulse pressure. Correlates of the central hemodynamic indexes were identified by stepwise regression with *P*-values for covariables to enter and stay in the models set at 0.15. For continuously distributed variables, the association size ( $\beta$ ) expresses the difference in central hemodynamic indexes associated with a 1-SD increment in the explanatory variable. R<sup>2</sup> is the coefficient of multiple determination and indicates the total variance explained by the models. Significance of the association sizes: \* *P*≤0.05; † *P*≤0.01.

**Table S4. Correlates of Pulse Wave Velocity, the Forward and Backward Wave and the Reflection Magnitude.**

| Variables                                 | PWV (m/s)<br>(n=657) | Forward Wave (n=835) |                   | Backward Wave (n=835) |                   | RM (%)<br>(n=835) |
|-------------------------------------------|----------------------|----------------------|-------------------|-----------------------|-------------------|-------------------|
|                                           |                      | Peak Time (ms)       | Amplitude (mm Hg) | Peak Time (ms)        | Amplitude (mm Hg) |                   |
| R2                                        | 0.46                 | 0.07                 | 0.14              | 0.35                  | 0.49              | 0.53              |
| Association size                          |                      |                      |                   |                       |                   |                   |
| Female sex (0,1)                          | -0.32±0.10†          | -6.25±0.90†          | -3.20±0.79†       | 11.0±1.4†             | 2.74±0.56†        | 12.4±0.95†        |
| Age (+15.2 years)                         | 0.79±0.06†           | ...                  | ...               | 7.48±0.72†            | 3.75±0.28†        | 9.86±0.49†        |
| Mean arterial pressure (+10.8 mm Hg)      | 0.34±0.06†           | -2.19±0.47†          | 2.68±0.38†        | 2.01±0.74†            | 2.95±0.26†        | 2.95±0.52†        |
| Waist-to-hip circumference ratio (+0.08)  |                      | ...                  | -1.49±0.42†       | ...                   | -0.61±0.33        | ...               |
| Body mass index (+4.1 kg/m <sup>2</sup> ) |                      | 0.71±0.46            | ...               | -1.39±0.67*           | -0.63±0.26*       | -0.98±0.46*       |
| Heart rate (+9.2 beats per minute)        | 0.09±0.05            | ...                  | ...               | -9.94±0.66†           | -2.00±0.23†       | -5.40±0.46†       |
| Serum total cholesterol (+0.92 mmol/L)    |                      | ...                  | -1.54±0.35†       | 1.34±0.66*            | -0.56±0.23*       | 1.35±0.46†        |
| HDL cholesterol (+0.35 mmol/L)            |                      | ...                  | ...               | ...                   | ...               | ...               |
| Plasma glucose (+0.76 mmol/L)             | 0.13±0.05†           | ...                  | 0.85±0.34*        | -1.05±0.66            | 0.42±0.23         | ...               |
| Smoking (0,1)                             |                      | ...                  | -1.96±0.92*       | ...                   | ...               | 4.89±1.21†        |
| Drinking (0,1)                            |                      | ...                  | ...               | ...                   | ...               | ...               |
| Use of antihypertensive drugs (0,1)       | 0.29±0.14*           | 1.77±1.13            | 3.37±0.87†        | ...                   | 2.25±0.60†        | ...               |

PWV, aortic pulse wave velocity; RM, reflection magnitude. Correlates of the central hemodynamic indexes were identified by stepwise regression with *P*-values for covariables to enter and stay in the models set at 0.15. For continuously distributed variables, the association size ( $\beta$ ) expresses the difference in central hemodynamic indexes associated with a 1-SD increment in the explanatory variable. *R*<sup>2</sup> is the coefficient of multiple determination and indicates the total variance explained by the models. Significance of the association sizes: \* *P*≤0.05; † *P*≤0.01.

**Table S5. Association of Central Hemodynamic Traits and dp-ucMGP in Untreated Participants.**

| Hemodynamics                       | Unadjusted Models    |          | Adjusted Models       |          |
|------------------------------------|----------------------|----------|-----------------------|----------|
|                                    | Estimate (95%CI)     | <i>P</i> | Estimate (95%CI)      | <i>P</i> |
| Central systolic pressure (mm Hg)  | 5.64 (4.14 to 7.14)  | <0.001   | 1.52 (0.02 to 3.03)   | 0.047    |
| Central diastolic pressure (mm Hg) | 2.17 (1.25 to 3.10)  | <0.001   | -0.21 (-1.16 to 0.74) | 0.66     |
| Central pulse pressure (mm Hg)     | 3.45 (2.20 to 4.71)  | <0.001   | 1.75 (0.42 to 3.09)   | 0.010    |
| Augmentation pressure (mm Hg)      | 2.72 (1.97 to 3.48)  | <0.001   | 0.56 (-0.02 to 1.13)  | 0.056    |
| Augmentation ratio (%)             | 2.06 (1.42 to 2.69)  | <0.001   | 0.31 (-0.14 to 0.76)  | 0.18     |
| Augmentation index (%)             | 3.03 (1.90 to 4.17)  | <0.001   | 0.11 (-0.77 to 1.00)  | 0.80     |
| Pulse wave velocity (m/s, n=657)   | 0.58 (0.42 to 0.74)  | <0.001   | 0.16 (0.02 to 0.30)   | 0.032    |
| Forward wave amplitude (mm Hg)     | 0.84 (-0.13 to 1.80) | 0.088    | 1.11 (0.07 to 2.15)   | 0.037    |
| Backward wave amplitude (mm Hg)    | 2.10 (1.40 to 2.80)  | <0.001   | 0.74 (0.10 to 1.38)   | 0.023    |
| Reflection magnitude (%)           | 3.87 (2.12 to 5.61)  | <0.001   | -0.27 (-1.67 to 1.14) | 0.71     |

Association sizes (95% confidence interval) express the difference in the hemodynamic indexes associated with a doubling higher matrix Gla protein. Adjusted models accounted for sex, age, body mass index, waist-to-hip circumference ratio, heart rate, serum total cholesterol and high-density lipoprotein cholesterol, plasma glucose, and smoking and drinking. The augmentation ratio and index, pulse wave velocity, forward and backward wave amplitudes and reflection magnitude were also adjusted for mean arterial pressure.

**Table S6. Characteristics of Participants Analyzed and Not Analyzed.**

| <b>Characteristics</b>               | <b>Analyzed</b> | <b>Not Analyzed</b> | <b>P</b> |
|--------------------------------------|-----------------|---------------------|----------|
| Number of participants (%)           | 835             | 560                 |          |
| All patients in category             |                 |                     |          |
| Women                                | 381 (45.6)      | 331 (59.1)          | <0.001   |
| Smokers                              | 132 (15.8)      | 109 (19.5)          | 0.077    |
| Drinking alcohol                     | 353 (42.3)      | 208 (37.1)          | 0.06     |
| Hypertension                         | 341 (40.8)      | 259 (46.2)          | 0.045    |
| Antihypertensive treatment           | 174 (20.8)      | 164 (29.3)          | <0.001   |
| History of cardiovascular disease    | 39 (4.7)        | 34 (6.1)            | 0.25     |
| Mean (SD) of characteristic          |                 |                     |          |
| Age (years)                          | 49.7±15.2       | 53.0±16.6           | 0.001    |
| Body mass index (kg/m <sup>2</sup> ) | 26.2±4.1        | 26.8±4.8            | 0.005    |
| Systolic pressure (mm Hg)            | 128.6±16.2      | 130.5±19.3          | 0.044    |
| Diastolic pressure (mm Hg)           | 78.6±9.3        | 78.6±10.3           | 0.87     |
| Serum total cholesterol (mmol/L)     | 5.04±0.92       | 5.26±1.01           | <0.001   |
| Plasma glucose (mmol/L)              | 4.87±0.76       | 4.89±0.65           | 0.61     |

HDL, high-density lipoprotein. Hypertension was a blood pressure of  $\geq 140$  mm Hg systolic or  $\geq 90$  mm Hg diastolic or use of antihypertensive drugs. The *P*-value denotes the significance of the difference between participants analyzed and not analyzed.

Figure S1. Pressure-based wave separation analysis algorithm.

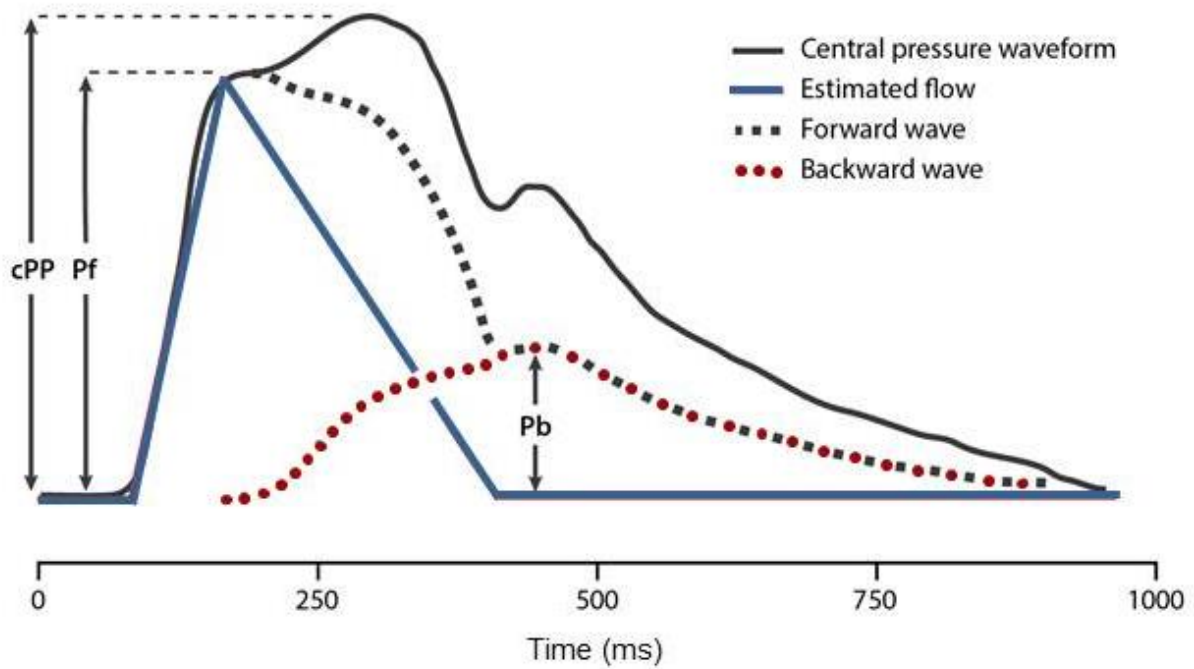

A central pressure waveform is separated in its forward and backward wave component using a triangular-shaped flow estimate. Start, peak and end of the estimated flow curve are derived from the ejection period and the first shoulder of the central pressure curve. cPP indicates central pulse pressure; Pb, backward wave amplitude; Pf, forward wave amplitude.



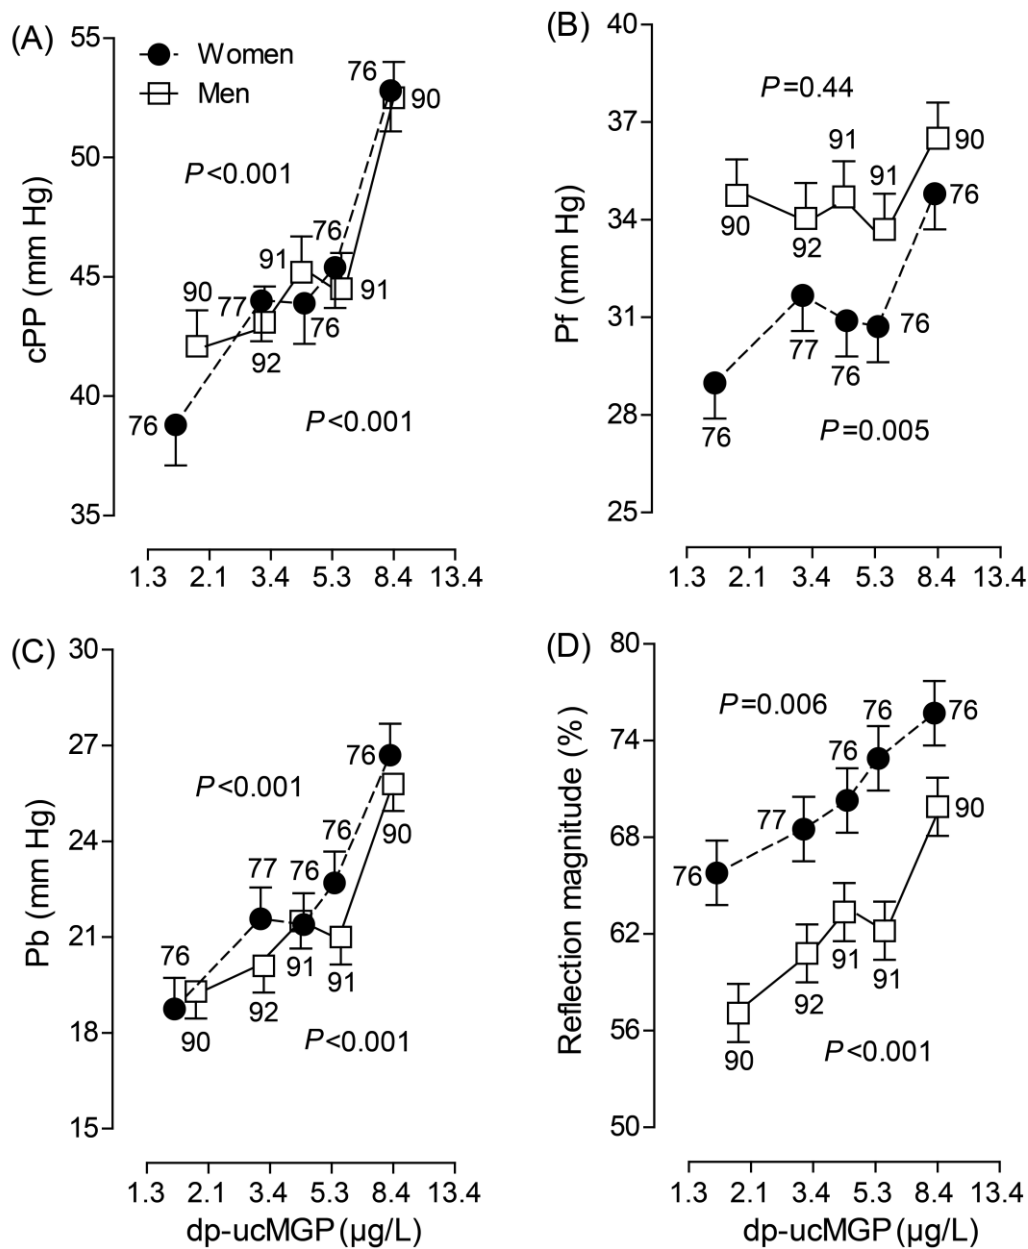

**Figure S2. Central pulse pressure (A [cPP]), forward wave amplitude (B [Pf]), backward wave amplitude (C [Pb]) and reflection magnitude (D) by quintiles of the sex-specific distribution of inactive desphospho-uncarboxylated matrix Gla protein (dp-ucMGP).** Vertical bars indicate standard errors. *P*-values are for linear trend across the quintiles of the dp-ucMGP distribution.

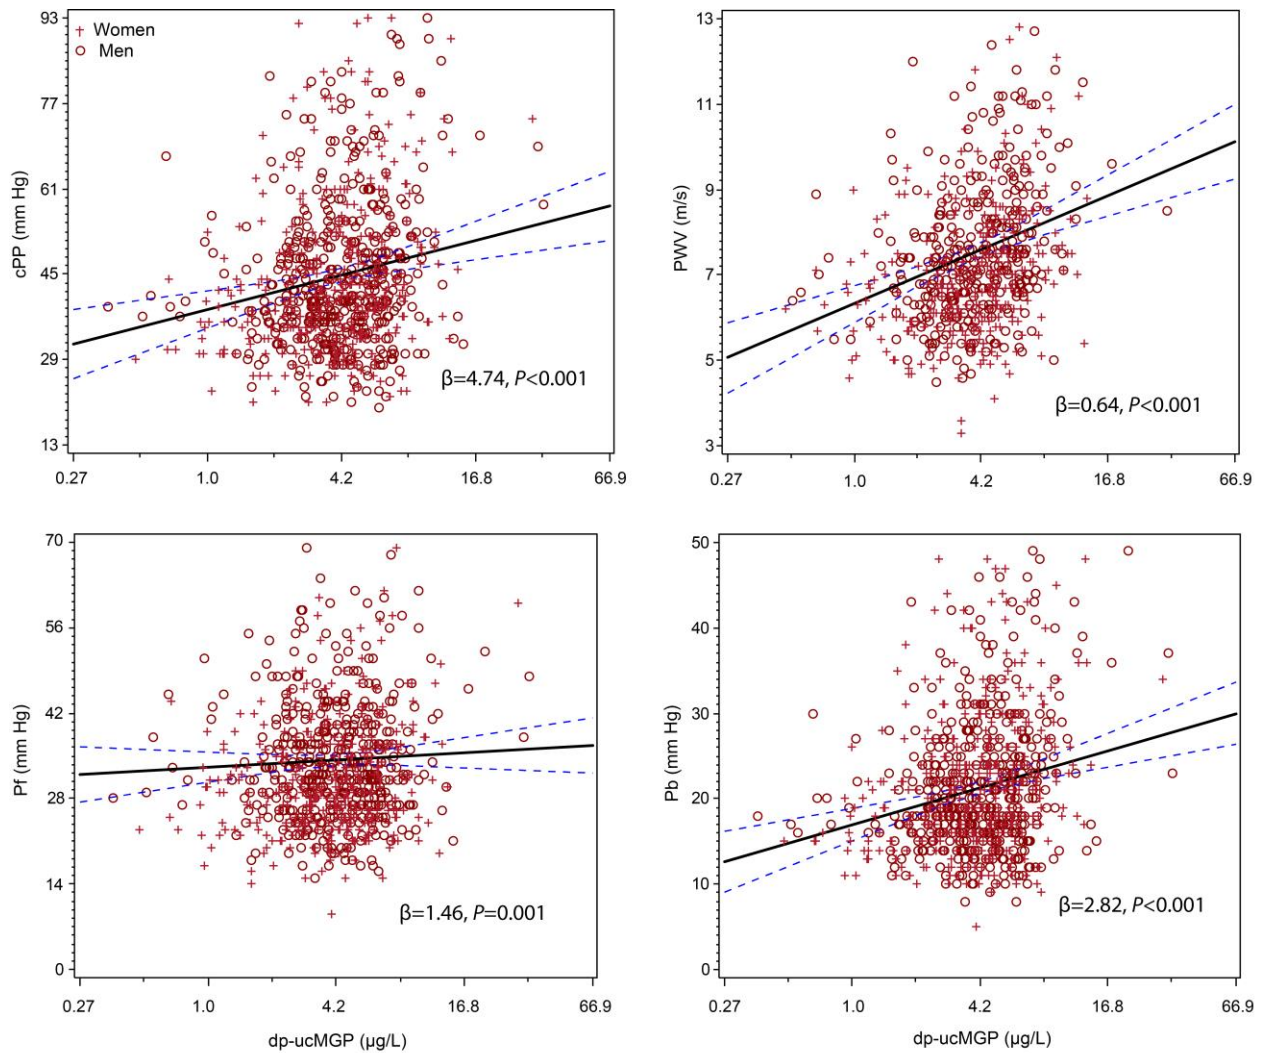

**Figure S3. Unadjusted associations of central pulse pressure (A [cPP]), aortic pulse wave velocity (B [PWV]), the forward wave amplitude (C [Pf]) and the backward wave amplitude (D [Pb]) with inactive desphospho-uncarboxylated matrix Gla protein (dp-ucMGP).** The forward and backward pulse pressure amplitudes were derived from the central pulse wave by a triangular-flow pressure-based wave separation algorithm. Regression lines are given with the 95% confidence interval for prediction of the mean.

**Figure S4. Contractile vascular smooth muscle cells (VSMCs) synthesize matrix Gla protein (MGP).**

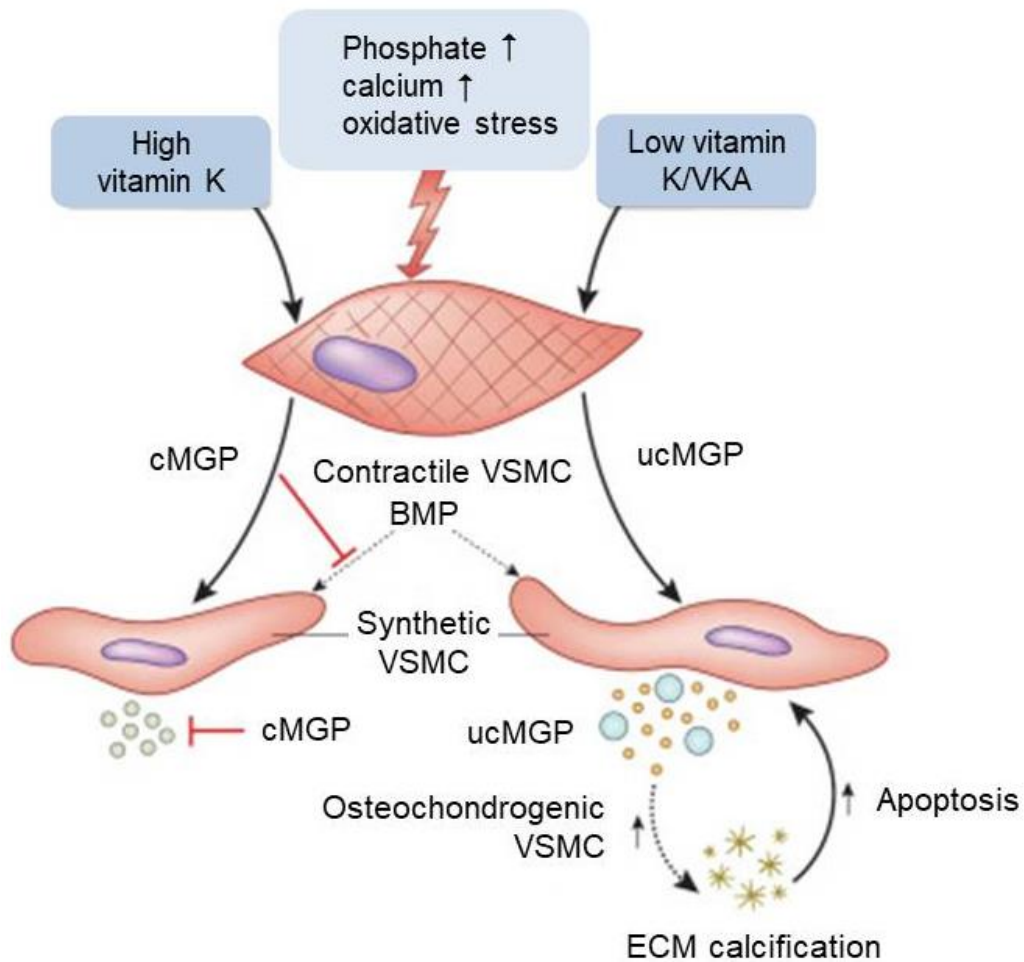

In the presence of sufficient vitamin K, MGP is carboxylated (cMGP) and thereby prevents mineralization of VSMCs and the extracellular matrix (ECM) and inhibits transdifferentiation of VSMCs. Under pathologic conditions (e.g., high calcium, high phosphate or increased oxidative stress), VSMCs differentiate from a contractile to an osteochondrogenic phenotype. In the case of vitamin K deficiency, MGP remains uncarboxylated (ucMGP). Transdifferentiated VSMCs produce less MGP, are susceptible to apoptosis, and secrete more matrix vesicles and apoptotic bodies, resulting in extracellular mineralization. Reprinted with adaptations from Schurgers et al<sup>1</sup> with permission. Copyright ©2013, Elsevier Inc.

**Supplemental Reference:**

1. Schurgers LJ. Vitamin K: key vitamin in controlling vascular calcification in chronic kidney disease. *Kidney Intern.* 2013;83:782–784.
